# Supplementary material for: Molecular Analyses Support the Safety and Activity of Retroviral Replicating Vector Toca 511 in Patients
Source: Oxford University Press journal article supplement (doi:10.1158/1078-0432.ccr-18-0619), 2018-06-26
Supplement: 10780432ccr180619-sup-197302_2_supp_4791358_p9jxq0.xlsx [file 10780432ccr180619-sup-197302_2_supp_4791358_p9jxq0.xlsx]

## Sheet: study11_blood_DNA
patient	cohort	visit	copies/ug
11_06	2	5	3427
11_06	2	7	453
11_09	3	5	280
11_24	5	4	715
11_05	2	7	2634
11_18	4	7	314
11_29	5	C1	1544
11_33	5	4	284
11_33	5	7	648
11_33	5	4a	962
11_36	6a	4	180

## Sheet: study11_blood_RNA
patient	cohort	Visit#	copies/mL
11_06	2	5	32356
11_08	3	4	196632
11_11	3	4	42506
11_14	4	4	8684
11_30	5	2	5714
11_43	6b	2	23551
11_24	5	2	88757
11_41	6b	4	47439
11_41	6b	3a	61306
11_33	5	2	30557
11_35	6a	2	776931
11_35	6a	4	4540
11_40	6b	2	697775
11_40	6b	3a	50679
11_42	6b	2	3844410
11_36	6a	2	9486
11_44	6b	2	1481370
11_44	6b	3A	26972
11_45	7a	2	83126
11_47	7a	2	413177
11_47	7a	4	91774

## Sheet: study13_tumor_DNA
Patient ID	Cohort	Pos/Total (Sections)	Copies/μg
13_01	1	0/16	<LLOQ
13_02	2	0/9	<LLOQ
13_03	3	1/29	24
13_04	3	0/21	<LLOQ
13_05	3	0/29	<LLOQ
13_06	4	0/40	<LLOQ
13_07	4	1/11	1350
13_08	4	3/23	105-628
13_09	4	0/8	<LLOQ
13_10	4	2/80	426-738
13_11	4	0/14	<LLOQ
13_12	4b	1/48	2690
13_13	4b	11/26	1,630-46,900
13_14	4b	0/10	<LLOQ
13_15	5	2/55	226-1,500
13_16	5	2/50	926-1,980
13_17	5	0/38	<LLOQ

## Sheet: study13_tumor_RNA
patient	Cohort	Pos/Total (Sections)	copies/μg
13_01	1	0/16	<LLOQ
13_02	2	0/9	<LLOQ
13_03	3	22/29	165 - 5,210
13_04	3	0/21	<LLOQ
13_05	3	4/29	481 - 4,960
13_06	4	0/40	<LLOQ
13_07	4	5/11	303 - 25,400
13_08	4	9/23	23 - 1,974
13_09	4	0/8	<LLOQ
13_10	4	7/80	17 - 2,370
13_11	4	2/14	199 - 475
13_12	4b	1/48	148
13_13	4b	0/26	<LLOQ
13_14	4b	1/10	154
13_15	5	1/55	33
13_16	5	0/50	<LLOQ
13_17	5	0/38	<LLOQ

## Sheet: study11_reresection_DNA
Patient ID	Cohort	Pos/Total (Sections)	Copies/μg
11_01	1	0/11	<LLOQ
11_02	1	7/11	338 - 3,728
11_03	1	0/7	<LLOQ
11_11	3	0/1	<LLOQ
11_12	3	1/5	479
11_25	5	0/4	<LLOQ
11_26	5	0/7	<LLOQ
11_31	5	2/7	241 - 259
11_37	6a	0/2	<LLOQ

## Sheet: study11_reresection_RNA
Patient ID	Cohort	Pos/Total (Sections)	Copies/µg
11_01	1	0/11	<LLOQ
11_02	1	5/11	365 – 16,273
11_03	1	0/7	<LLOQ
11_11	3	0/1	<LLOQ
11_25	5	0/4	<LLOQ
11_26	5	0/7	<LLOQ
11_31	5	1/7	20,500
11_37	6a	0/2	<LLOQ

## Sheet: summary_percent
location	total	positive	percentage
blood	56	8	16.6667
urine	56	0	0
saliva	56	0	0
tumor (IV)	17	8	47.0588
re_tumor	7	3	42.8571

## Sheet: DNA_quant_levels
subvject	visit	location	quant
01-206	5	blood	3427
01-206	7	blood	453
03-209	5	blood	280
07-224	4	blood	715
09-205	7	blood	2634
09-218	7	blood	314
09-229	C1	blood	1544
09-233	4	blood	284
09-233	7	blood	648
09-233	4a	blood	962
10-236	4	blood	180
303	1/29	tumor	24
307	1/11	tumor	1350
308	3/23	tumor	628
310	2/80	tumor	738
312	1/48	tumor	2690
313	11/26	tumor	46900
315	2/55	tumor	1500
316	2/50	tumor	1980
202	7/11	re_tumor	3728
212	1/5	re_tumor	479
231	2/7	re_tumor	259
