# Supplementary material for: Molecular Analyses Support the Safety and Activity of Retroviral Replicating Vector Toca 511 in Patients
Source: Oxford University Press journal article supplement (doi:10.1158/1078-0432.ccr-18-0619), 2018-06-26
Supplement: 10780432ccr180619-sup-197302_2_supp_4807543_p9w9ls.docx [file 10780432ccr180619-sup-197302_2_supp_4807543_p9w9ls.docx]

| Cohort # | Dosing Cohort in TU/g of brain | Toca FC Dose (mg/kg/day) |
| --- | --- | --- |
| 1 | 9.5 x 103 | 130 x 8 days |
| 2 | 2.5 x 104 |
| 3 | 1 x 105 |
| 4 | 3.2 x 105 |
| 5a | 1 x 106 |
| 5b | 135 x 14 days |
| 5c | 170 x 7 days |
| 6a | 3.2 x 106 |
| 6b | 220 x 7 days |
| 7a | 7.9 x 105 |
| 7b |
| 7c |

1. Cohort 7a consists of Toca 511 and Toca FC, with new set of administration instructions
2. Cohort 7b consists of Toca 511, Toca FC and lomustine (110 mg/m2 every 6 weeks, orally)
3. Cohort 7c consists of Toca 511, Toca FC and bevacizumab (10 mg/kg every 2 weeks, IV)
